# Supplementary material for: Interfacial Behavior of Solid- and Liquid-like Polyelectrolyte Complexes as a Function of Charge Stoichiometry
Source: MDPI journal article supplement (doi:10.3390/polym13213848), 2021-11-07
Supplement: s1 [file s1]

# **Interfacial Behavior of Solid- and Liquid-like Polyelectrolyte Complexes as a Function of the Charge Stoichiometry**

*Hongwei Li,<sup>1,2</sup> Martin Fauquignon<sup>1,2</sup> Marie Haddou,<sup>1,2</sup> Christophe Schatz,<sup>2</sup> Jean-Paul Chapel<sup>1</sup>*

*<sup>1</sup>Centre de Recherche Paul Pascal (CRPP), UMR CNRS 5031, Univ. Bordeaux, 33600 Pessac, France.*

*<sup>2</sup>Univ. Bordeaux, CNRS, Bordeaux INP, LCPO, UMR 5629, F-33600 Pessac, France*

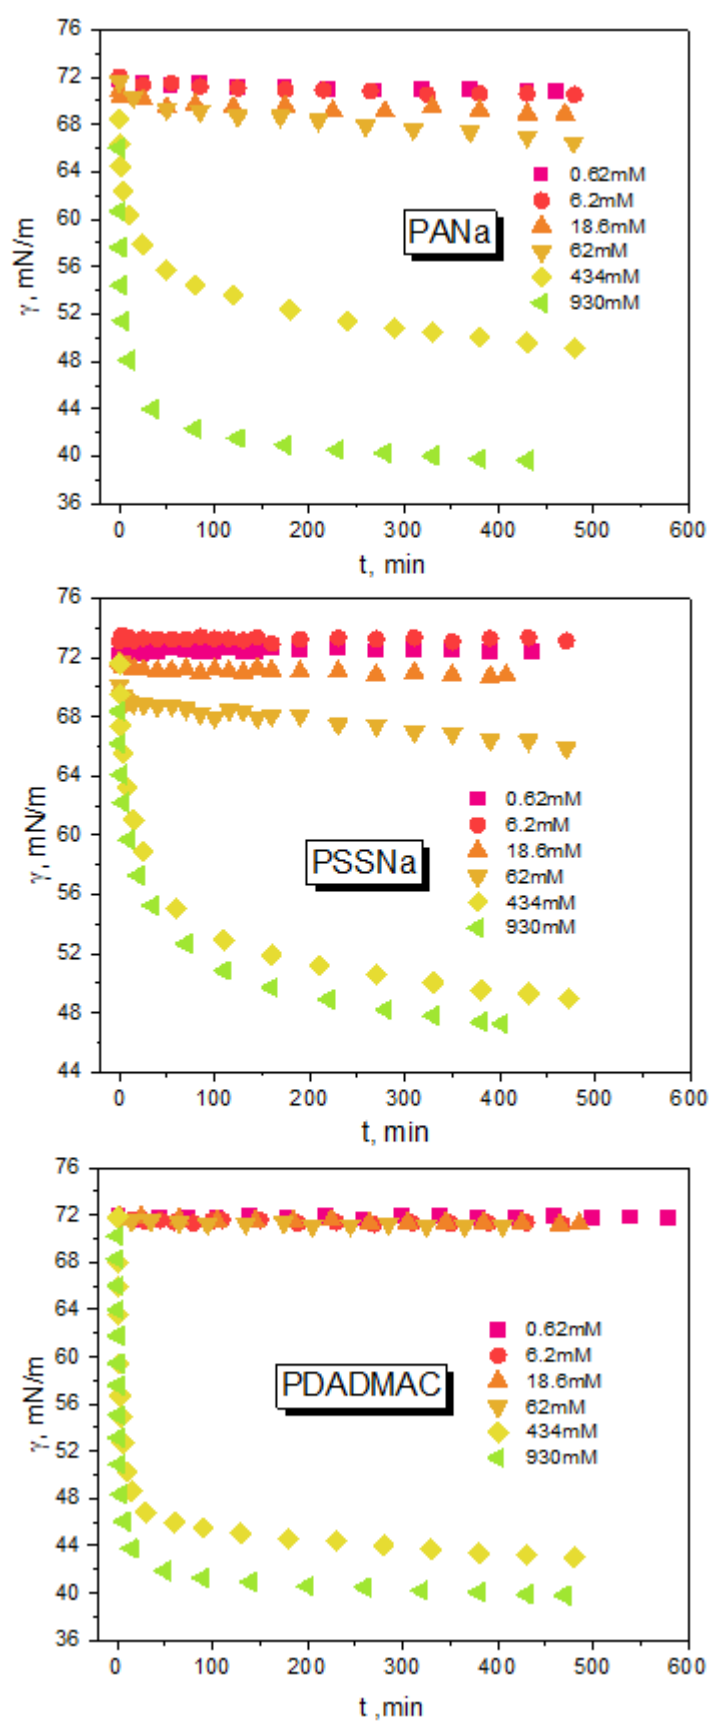

**Figure S1.** Dynamic surface tension ( $\gamma$ ) of PANa, PSSNa and PDADMAC solutions at different concentrations (in repetitive units) determined by pendant-drop measurements

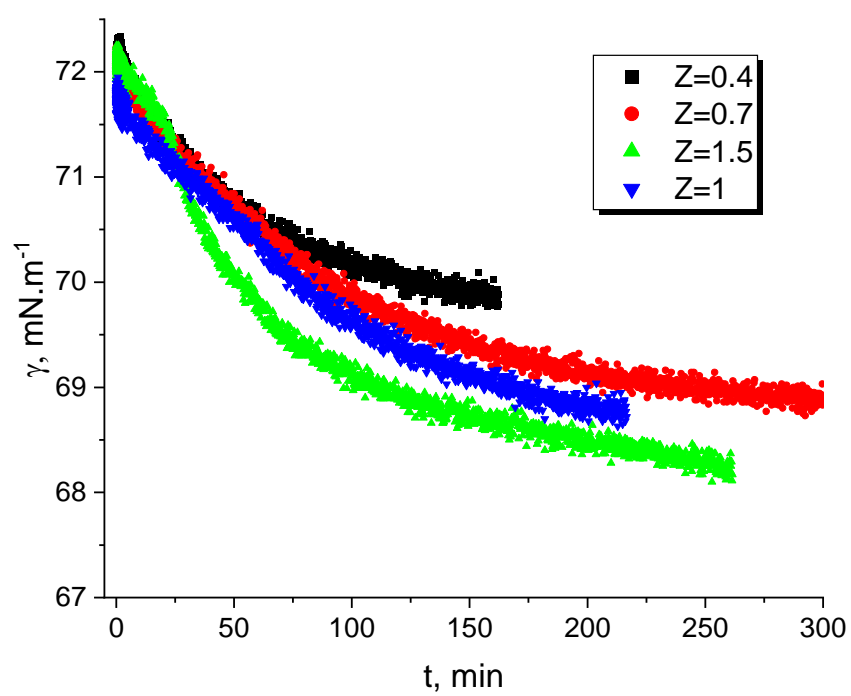

**Figure S2.** Dynamic surface tension ( $\gamma$ ) of PDADMAC/PANa complexes prepared *off* the stoichiometry at  $Z=0.4, 0.7, 1.0$  and  $1.5$  from 1 mM PE stock solutions.
